# Supplementary material for: Doxorubicin and PD-L1 siRNA co-delivery with stem cell membrane-coated polydopamine nanoparticles for the targeted chemoimmunotherapy of PCa bone metastases
Source: Royal Society of Chemistry journal article supplement (doi:10.1039/d0nr08024a), 2021-01-01
Supplement: d0nr08024a1.pdf [file d0nr08024a1.pdf]

## Supporting Information

### **Doxorubicin and PD-L1 siRNA co-delivery with stem cell membrane-coated Polydopamine nanoparticles for targeted chemoimmunotherapy of PCa bone metastases**

Xupeng Mu,<sup>‡a</sup> Meng Zhang,<sup>‡a</sup> Anhui Wei,<sup>b</sup> Fei Yin,<sup>c</sup> Yan Wang,<sup>d</sup> Kebang Hu<sup>\*e</sup> and Jinlan Jiang<sup>\*a</sup>

<sup>a</sup> Scientific Research Center, China-Japan Union Hospital, Jilin University, Changchun, China. *E-mail: jiangjinlan@jlu.edu.cn*

<sup>b</sup> College of Pharmacy, Jilin University, Changchun, China

<sup>c</sup> Department of Orthopedics, China-Japan Union Hospital, Jilin University, Changchun, China

<sup>d</sup> Department of Hepatobiliary surgery, China-Japan Union Hospital, Jilin University, Changchun, China

<sup>e</sup> Department of Urology, The First Hospital of Jilin University, Changchun, China. *E-mail: hukb@jlu.edu.cn*

\* Corresponding authors

‡ These authors contributed equally to this work.

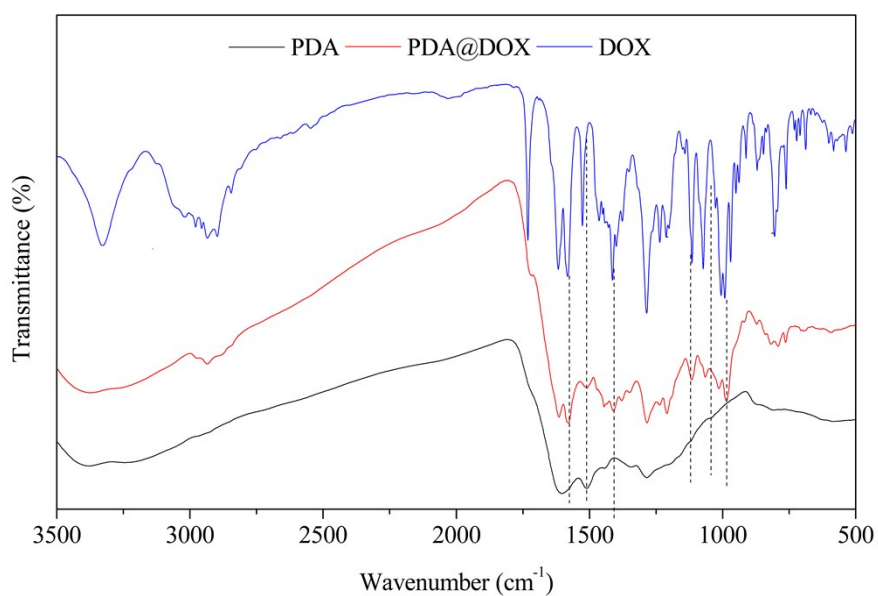

Fig.S1 FTIR spectra of DOX, PDA and PDA-DOX NPs.

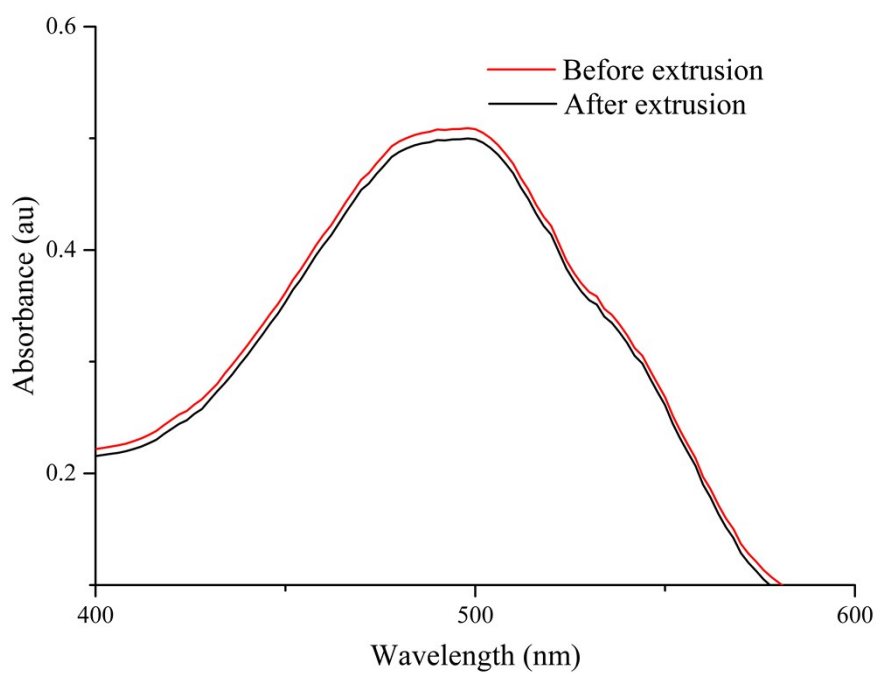

Fig.S2 UV-vis spectroscopy showed the adsorption of DOX solution released from PDA-DOX NPs before (red line) and after physical extrusion (black line).

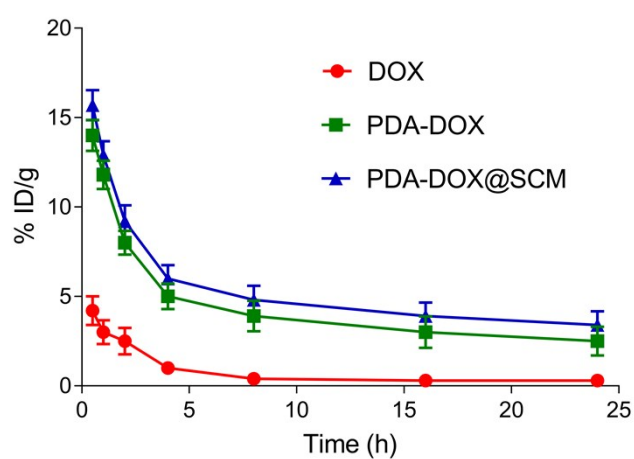

Fig. S3 In vivo pharmacokinetic studies of DOX in blood after DOX, PDA-DOX, and PDA-DOX@SCM were intravenously injected into tumor-bearing nude mice (DOX dose: 5 mg/kg) over a span of 24 h.

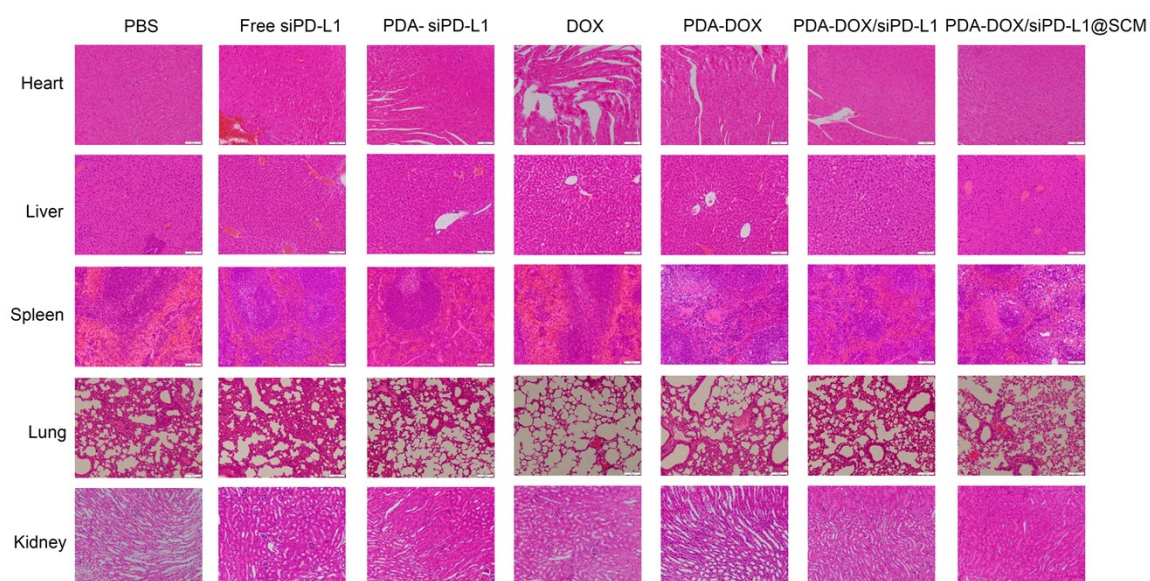

Fig. S4 H&E staining images of major organs (heart, liver, spleen, lung, and kidney) dissected from each group after different treatment. Scale bar = 50  $\mu$ m.
